# Supplementary material
Source: PubMed Central journal article supplement (PMC8010636)
Supplement: NIHMS1683723-supplement-1.pdf [file NIHMS1683723-supplement-1.pdf]

Supplementary Figure 1

Ki67/Trop2/CD44v9

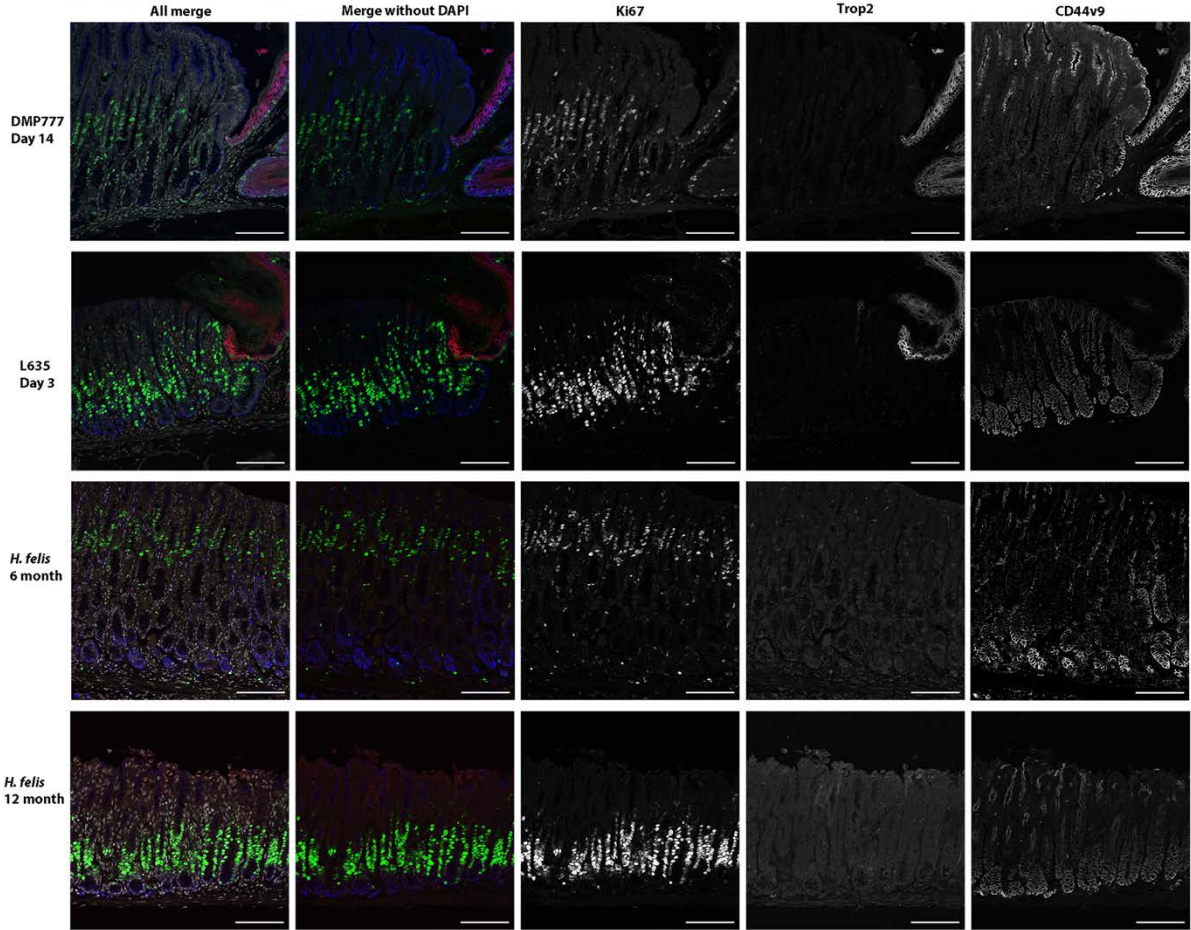

Supplementary Figure 2

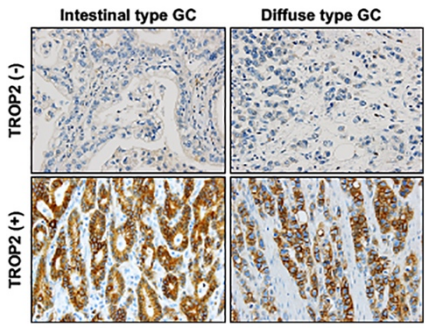

Supplementary Figure 3

TROP2/CD44v9/TFF3

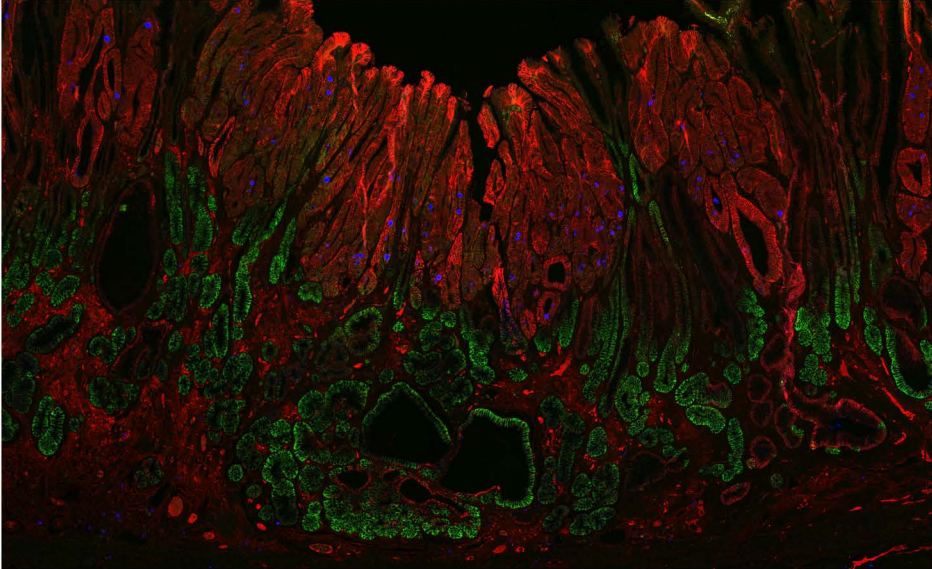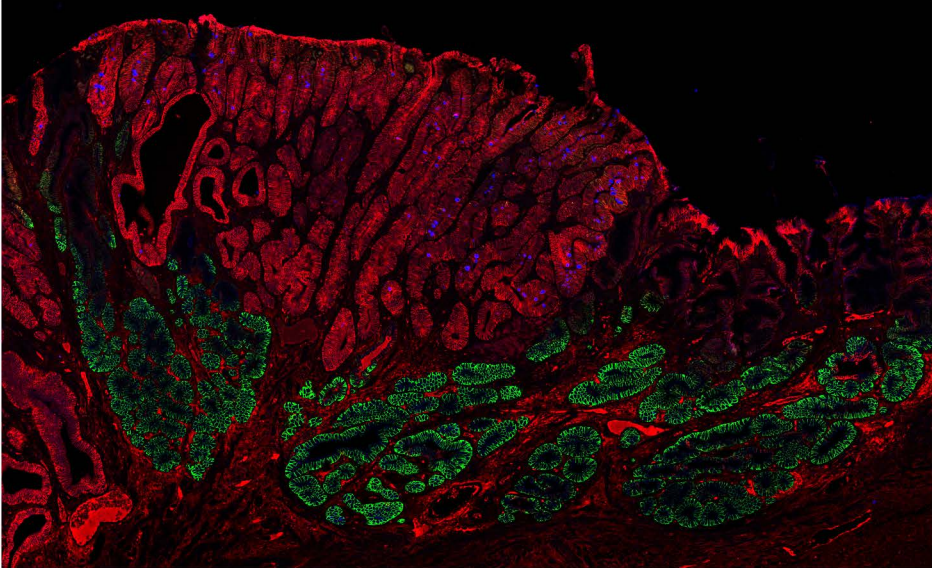

**Supplemental Figure 1: Trop2 is not observed in SPEM induced by acute oxyntic atrophy or *H. felis* infection.** Sections of mouse stomach from mice (n=3 for all groups) treated with 14 days of DMP-777 or 3 days of L635 to induce acute SPEM or mice infected with *H. felis* for 6 or 12 months were stained for CD44v9 (blue), Ki67 (green) and Trop2 (red) along with nuclear staining with DAPI (greyscale). Squamous forestomach stained positively for Trop2 and CD44v9 as an internal control in DMP-777 and L635 mice. SPEM did not stain for Trop2 in any of the models. Scale bar = 100  $\mu$ m.

**Supplemental Figure 2: Trop2 immunostaining in gastric cancers.** Examples of negative and positive TROP2 immunostaining in intestinal type and diffuse gastric cancers.

**Supplemental Figure 3. Trop2 staining in dysplastic lesions from Canadian patients.** Representative immunostaining of intramucosal dysplasia in two of four samples from non-Asian Canadian gastric cancer patients. Sections were stained for TROP2 (red), CD44v9 (green) and TFF3 (blue). Note the separation of CD44v9 staining lineages (SPEM) from Trop2-stained dysplastic cells. Bar = 100  $\mu$ m.

Supplemental Table 1: Association between the TROP2 expression and the clinicopathological characteristics

|                     | Total (%) | TROP2    |          | <i>p</i> -value <sup>#</sup> |
|---------------------|-----------|----------|----------|------------------------------|
|                     |           | Low (%)  | High (%) |                              |
| Patients            | 740 (100) | 459 (62) | 282 (38) |                              |
| Age                 |           |          |          |                              |
| <65                 | 482 (65)  | 313 (65) | 169 (35) | 0.02                         |
| ≥65                 | 258 (34)  | 145 (56) | 113 (44) |                              |
| Gender (n = 739)    |           |          |          |                              |
| Female              | 233 (32)  | 158 (68) | 75 (32)  | 0.028                        |
| Male                | 506 (68)  | 300 (59) | 206 (41) |                              |
| Location (n = 732)  |           |          |          |                              |
| Upper               | 101 (14)  | 57 (56)  | 44 (34)  | 0.028                        |
| Middle              | 284 (39)  | 195 (69) | 89 (31)  |                              |
| Lower               | 337 (46)  | 195 (58) | 142 (42) |                              |
| Whole               | 10 (1)    | 6 (60)   | 4 (40)   |                              |
| Lauren              |           |          |          |                              |
| Intestinal          | 289 (39)  | 175 (61) | 114 (39) | 0.241                        |
| Diffuse             | 334 (45)  | 216 (65) | 118 (35) |                              |
| Mixed               | 111 (15)  | 62 (56)  | 49 (44)  |                              |
| Undetermined        | 6 (1)     | 5 (67)   | 1 (33)   |                              |
| Histological        |           |          |          |                              |
| Papillary           | 15 (2)    | 6 (40)   | 9 (60)   | 0.000                        |
| Tubular             |           |          |          |                              |
| Well                | 134 (18)  | 61 (45)  | 73 (55)  |                              |
| Moderate            | 296 (40)  | 185 (63) | 111 (37) |                              |
| Poor                | 182 (25)  | 123 (68) | 59 (32)  |                              |
| Signet ring cell    | 91 (12)   | 70 (77)  | 21 (23)  |                              |
| Mucinous            | 15 (2)    | 14 (93)  | 1 (7)    |                              |
| Others              | 7 (1)     | 4 (57)   | 3 (43)   |                              |
| Lymphatic invasion  |           |          |          |                              |
| Negative            | 262 (35)  | 173 (66) | 89 (34)  | 0.086                        |
| Positive            | 478 (65)  | 285 (60) | 193 (40) |                              |
| Venous invasion     |           |          |          |                              |
| Negative            | 612 (83)  | 382 (63) | 230 (37) | 0.519                        |
| Positive            | 128 (17)  | 76 (60)  | 52 (41)  |                              |
| Perineural invasion |           |          |          |                              |
| Negative            | 323 (44)  | 201 (62) | 122 (37) | 0.868                        |
| Positive            | 417 (56)  | 257 (62) | 160 (38) |                              |
| Tumor stage         |           |          |          |                              |
| I                   | 186 (25)  | 117 (63) | 69 (37)  | 0.957                        |
| II                  | 208 (28)  | 129 (62) | 79 (38)  |                              |
| III                 | 270 (36)  | 167 (62) | 103 (38) |                              |
| IV                  | 76 (10)   | 45 (59)  | 31 (40)  |                              |
| CDX2 (n = 679)      |           |          |          |                              |

|                     |          |          |          |       |
|---------------------|----------|----------|----------|-------|
| Negative            | 546 (80) | 338 (62) | 208 (38) | 0.831 |
| Positive            | 133 (20) | 81 (61)  | 52 (39)  |       |
| <hr/>               |          |          |          |       |
| #Pearson Chi-square |          |          |          |       |

Supplemental Table 2: List of all resource information

| <b>Primary</b>                                                  | <b>Company, Location</b>                 | <b>Product Number</b> |
|-----------------------------------------------------------------|------------------------------------------|-----------------------|
| Mouse Trop2 (1:200 for immunostaining, 1:2000 for western blot) | R&D Systems, Minneapolis, MN             | AF1122                |
| Human Trop2 (1:200)                                             | R&D Systems, Minneapolis, MN             | AF650                 |
| Mouse CD44v9 (1:25,000)                                         | Cosmo Bio, Carlsbad, CA                  | CAC-LKG-M002          |
| Human CD44v9 (1:10,000)                                         | Cosmo Bio, Carlsbad, CA                  | CAC-LKG-M001          |
| TFF3 (1:1000)                                                   | Atlas Antibodies, Bromma, Sweden         | HPA035464             |
| Muc2 (1:300)                                                    | Santa Cruz Biotechnology, Dallas, TX     | sc-15334              |
| Ki67 (1:100)                                                    | Abcam, Cambridge, MA                     | ab16667               |
| PCNA (1:2000)                                                   | Cell Signaling Technology, Danvers, MA   | 2586S                 |
| $\beta$ -Actin (1:5000)                                         | Sigma-Aldrich, St. Louis, MO             | A5316                 |
| Villin (1:300)                                                  | Cell Signaling Technology                | 2369                  |
| <b>Secondary</b>                                                |                                          |                       |
| Donkey anti-rabbit Cy2 (1:500)                                  | Jackson Laboratories                     |                       |
| Donkey anti-goat Cy3 (1:500)                                    | Jackson Laboratories                     |                       |
| Donkey anti-rat Cy5 (1:500)                                     | Jackson Laboratories                     |                       |
| Donkey anti-mouse Alexa 750 (1:500)                             | Abcam, Cambridge, MA                     | ab175738              |
| DAPI (1:3000, 1:5000)                                           |                                          |                       |
| Hoechst 33342 Solution (1:1000, 1:5000)                         | Thermo Scientific, Waltham, MA           | 62249                 |
| IRDye 800CW donkey anti-goat (1:10000)                          | LI-COR Biosciences                       | 926-32214             |
| IRDye 680LT donkey anti-mouse (1:10000)                         | LI-COR Biosciences                       | 926-68022             |
|                                                                 |                                          |                       |
| <b>Immunofluorescence Staining Resources</b>                    |                                          |                       |
| Histoclear                                                      | National Diagnostics, Atlanta, GA        |                       |
| Dako Target Retrieval Solution 10x                              | Dako North America, Inc, Carpinteria, CA | S1699                 |
| Dako Protein Block Serum-Free solution                          | Dako North America, Inc, Carpinteria, CA | X0909                 |

|                                                                |                                          |             |
|----------------------------------------------------------------|------------------------------------------|-------------|
| Dako Antibody Diluent with Background Reducing Components      | Dako North America, Inc, Carpinteria, CA | S3022       |
| Dako Antibody Diluent                                          | Dako North America, Inc, Carpinteria, CA | S0809       |
| Prolong Gold                                                   |                                          |             |
| N-acetylcysteine                                               |                                          |             |
|                                                                |                                          |             |
| <b>Culture media, harvest materials, other reagents or kit</b> |                                          |             |
| Intesticult Organoid Growth Medium (mouse)                     | StemCell Technologies, Cambridge, MA     | 06005       |
| ECM Gel                                                        | Sigma-Aldrich, St. Louis, MO             | E1270       |
| Penicillin/Streptomycin Solution                               | Corning, Corning, NY                     | 30-002-CI   |
| MycoZap Plus PR                                                | Lonza, Basel, Switzerland                | VZA-2021    |
| 4% Paraformaldehyde (PFA)                                      | Affymetrix, Santa Clara, CA              | 19943       |
| Y-27632 (ROCK inhibitor)                                       | StemCell Technologies, Cambridge, MA     | 72304       |
| DMEM/F12                                                       | Thermo Fisher, Waltham, MA               | 10-092-CV   |
| Fetal Bovine Serum (FBS)                                       |                                          |             |
| HistoGel                                                       | Thermo Scientific, Waltham, MA           | HG-4000-012 |
|                                                                |                                          |             |
| TrypLE                                                         | Thermo Fisher, Waltham, MA               | 12604013    |
| Polybrene                                                      |                                          |             |
| QIAprep Spin miniprep Kit                                      | Qiagen, Hilden, Germany                  | 27106       |
| Lenti-X                                                        | Takara Bio Inc., Shiga, Japan            | 631232      |
|                                                                |                                          |             |
| <b>Experimental Models and Cell lines</b>                      |                                          |             |
| Mist1-Kras mice                                                |                                          | n/a         |
| Meta4 organoids                                                |                                          | n/a         |
| Meta4 Trop2 knock down organoids                               |                                          | n/a         |
|                                                                |                                          |             |



| <b>Imaging Equipment</b> |                               |     |
|--------------------------|-------------------------------|-----|
| Nikon A1R                |                               | n/a |
| Versa                    |                               | n/a |
| Cytell                   |                               | n/a |
| EVOS                     | Thermo Fisher, Waltham,<br>MA | n/a |
| JuLI™ Stage              | Nanoentek                     | n/a |

Supplemental Table 3: Resource information on TACSTD2 Mission shRNA bacterial glycerol stock (Sigma-Aldrich, St. Louis, MO, SHCLNG-NM\_020047, species: mouse)

| Lab viral name | Product number            | Region | Sequence                                                       |
|----------------|---------------------------|--------|----------------------------------------------------------------|
| Virus 1        | TRCN00001127<br><u>00</u> | 3UTR   | CCGGGCTAGATAGCTTGGTTAAGAACTCGAGTT<br>CTTAACCAAGCTATCTAGCTTTTTG |
| Virus 2        | TRCN00001127<br><u>01</u> | CDS    | CCGGGCTCTTCCAAGAACGCTACAACCTCGAGTT<br>GTAGCGTTCTTGAAGAGCTTTTTG |
| Virus 3        | TRCN00001127<br><u>04</u> | CDS    | CCGGCCACCACATCCTCATTGAGTTCTCGAGAA<br>CTCAATGAGGATGTGGTGGTTTTG  |
